# Supplementary material for: European consensus conference on faecal microbiota transplantation in clinical practice
Source: PubMed Central journal article supplement — Gut. 2017 Jan 13;66(4):569–80. doi: 10.1136/gutjnl-2016-313017 (PMC5529972; doi:10.1136/gutjnl-2016-313017), 2017-01-13
Supplement: gutjnl-2016-313017supp001.pdf [file gutjnl-2016-313017supp001.pdf]

## Supplementary 1

### **RESULTS – OTHER INDICATIONS**

*Key issue: Inflammatory Bowel Disease (IBD)*

#### **FMT for ulcerative colitis (UC)**

**Statement:** There is insufficient evidence to recommend FMT as a treatment for UC in clinical practice. To date, its use should be limited to the research setting.

**Quality of evidence:** moderate

**Strength of recommendation:** weak

**Comment:** Alterations in the intestinal microbiota associated with IBD are well supported by the literature and have been widely accepted by the research community.(1) This led to the development of therapeutic avenues for IBD based on microbial modulation, including antibiotics, probiotics, prebiotics, synbiotics, and faecal microbiota transplantation.(2) In a recent meta-analysis,(3) Shi *et al.* found 14 cohort studies (4-17), and two RCTs on FMT for UC.(18, 19, 3-16) Subsequently, another RCT has been recently published as an abstract.(17) Overall clinical response and remission rates of cohort studies were reported to amount to approximately 60% and 40% respectively. However, these studies are limited by possible publication bias as well as by the presence of considerable clinical heterogeneity, especially with regard to patient selection and preparation, route and dosing of administration, follow-up time, and definition of outcomes.(3) Among the RCTs, two were reported as positive with a small but statistically significant treatment effect. Moayyedi *et al.* reported clinical and endoscopic remission of 24% in the FMT group versus 5% in the placebo group.(intention-to-treat analysis) (19) Paramsothy *et al.* obtained clinical remission and endoscopic improvement in 27% of the FMT group versus 8% of the placebo group (intention-to-treat analysis).(17) Treatment effects of this order were previously reported in large randomised ACT1 and ACT2 and ULTRA trials with infliximab and adalimumab for UC.(20) It is worth noting that the primary endpoint assessment was established after 6-8 weeks of treatment

with weekly or daily faecal enemas, and in that sense both trials only reflect remission induction. In contrast, the RCT by Rossen *et al.* did not show a statistically significant difference in clinical remission at 3 months between patients treated with two donor faeces administrations by nasojejunal tube at 0 and 3 weeks (per-protocol, 41.2%) in comparison to those who were given autologous faecal microbiota (controls – per-protocol, 25%).(18)

Data on changes in the microbiota signature in responders versus non-responders are available from the Dutch and the Canadian study.(18, 19) Both showed that responders in the active treatment group had more similarity to their donors than non-reponders. The Australian RCT used donor faeces derived from multiple donors, which precludes assessment of gain in microbiota similarity.(20)

From these RCTs, it can be deduced that indeed there seems to be a treatment effect of FMT in UC, but it is clear that it is not ‘one size fits all’. Hence, more research needs to be done regarding dosing and route of administration to enhance engraftment of the donor microbiota, as well as with respect to the optimal composition of donor faeces.(21)

Adverse events both in the cohort studies as well as in the RCTs were reported as mild and self-resolving. Cost-effectiveness has not been studied so far.

### **FMT for Crohn’s disease (CD)**

**Statement:** There is insufficient evidence to suggest FMT as a treatment for CD in clinical practice. To date, its use should be limited to research setting.

**Quality of evidence:** low

**Strength of recommendation:** weak

**Comment:** Seven cohort studies have been published on FMT in CD, (21-28) including 2 cohort studies in a paediatric population.(22, 23) There are no available RCTs using FMT in CD. The 2 pooled cohort studies reported clinical remission rate at 6 months as 22/32 (69%).(22, 23) There

were 3 studies that reported outcomes at 4-8 weeks and the overall remission rate was 10/27 (34%). One study reported a significant improvement in quality of life at 4 weeks after FMT using the IBD Questionnaire.(28) Adverse events were mostly reported as self-resolving. However, in a study by Vermeire *et al.*, one patient had aspiration pneumonia after applying FMT via the upper gastrointestinal tract, and as a result of this adverse event the authors changed their protocol regarding the route of faecal administration.(21)

Available studies appear to be considerably heterogeneous with regard to patient selection and preparation, route and dosing of administration, follow-up time, as well as definition of outcomes. In addition, there is the possibility of publication bias.

### **FMT for chronic pouchitis**

**Statement:** There is insufficient evidence to suggest FMT as a treatment for chronic pouchitis in clinical practice. To date, its use should be limited to research setting.

**Quality of evidence:** low

**Strength of recommendation:** weak

**Comment:** There have been two fully published studies on the use of FMT in pouchitis.(29, 30) Both were cohort studies. Stallmach *et al.* studied 5 patients following treatment failure with 10 days of antibiotics.(29) They were then given FMT via gastroscopy: at 4 weeks after FMT, 4 (80%) patients had resolution of symptoms, and at 3 months, 3 (60%) patients achieved a sustained response. Landy *et al.* conducted a trial of FMT in 8 patients with chronic refractory pouchitis, performing a single faecal infusion via nasogastric tube.(30) At 4 weeks following FMT, none of the patients achieved clinical remission but 2 patients, whose pouchitis was previously resistant to ciprofloxacin, regained sensitivity to ciprofloxacin enabling treatment in a standard way. Following FMT, there were variable shifts in faecal and mucosal microbiota composition towards a greater similarity to donor stool and, in some patients, changes in proportional abundance of species

suggestive of a “healthier” pouch microbiota. Both studies did not report any safety issues associated with FMT. Landy *et al.* reported minor adverse events, which were transient, in 3 patients (nausea, vomiting, bloating and fever).(30)

*Key issue: Irritable Bowel Syndrome (IBS)*

**Statement:** There is insufficient evidence to suggest FMT as a treatment for IBS in clinical practice. To date, its use should be limited to research setting.

**Quality of evidence:** low

**Strength of recommendation:** weak

**Comment:** Growing scientific evidence has shown the potential role of gut microbiota in the pathogenesis/pathophysiology of IBS.(31-35) Moreover, at least a subset of IBS patients have a different composition of gut microbiota compared with healthy subjects, and in some studies an association between microbiota composition and symptom pattern and severity has also been found.(35-39) However, currently, it is still debated if the alteration of the gut microbiota has a pathogenic role in IBS or if it is a consequence of other factors (e.g., host immune system, diet, medication, gut motility).(40)

Currently, there are no published RCTs with proper blinding investigating the effect of FMT in IBS. Only few case reports and small, uncontrolled studies have investigated on this issue. Old reports have shown that FMT in subjects with IBS can induce relief of symptoms in 50% of the cases.(41-43) More recently, by examining 13 subjects with IBS, Pinn *et al.* have shown that FMT induces a resolution or improvement of the symptoms in 70% of them.(44) In another recent open-label study, FMT provided adequate relief of overall IBS symptoms and abdominal bloating in nine of 12 (75%) patients with refractory IBS.(45). No data are available on the effect of FMT in subjects stratified by IBS type. There is, however, one pilot study demonstrating that FMT was safe and may have the potential to improve symptoms in patients with slow transit constipation.(46)

*Key issue: Metabolic disorders*

**Statement:** Higher evidence is needed to assess FMT efficacy in metabolic disorders, before its use in clinical setting can be advocated. To date, its use should be limited to research setting.

**Quality of evidence:** low

**Strength of recommendation:** weak

**Comment:** The study of the effectiveness of FMT in metabolic disorders in humans is still in its infancy, with one RCT in MS subjects published and several others underway.(47) Many observational studies in humans have shown microbiota differences between healthy individuals on one hand and obese,(48) MS,(49) or type 2 diabetic subjects on the other.(50) Causality has been studied using FMT in various mouse models.(51, 52) Several correlations between specific bacterial strains and aspects of the MS spectrum (obesity, glucose intolerance/type 2 diabetes, atherosclerosis, adipose tissue inflammation and liver steatosis) have been laid.(53-56) Intervention trials to test some of these strains are currently being carried out.

However, the ideal donor microbiota is not yet elucidated, mechanisms of engraftment are still poorly understood and resultant microbiota after FMT is largely temporary. Lastly, donor-recipient microbiota match can be an important determinant of microbiota engraftment.(57)

*Key issue: FMT in pediatrics*

### **FMT for recurrent *Clostridium difficile* infection in pediatrics**

**Statement:** FMT may have a role for the treatment of rCDI infection in paediatric clinical practice.

**Quality of evidence:** low

**Strength of recommendation:** weak

**Comment:** No RCTs in children with rCDI have been published so far. Data on the efficacy and safety of FMT used in this setting only rely on small observational studies, with up to 10 children

enrolled and no comparison group. In those studies, the overall efficacy of FMT was high, with success rates of 90-100%.<sup>(58-65)</sup> FMT was delivered either to the upper GI tract by nasogastric or transpyloric tubes or to the lower one through colonoscopy. In addition, data in very young children (< 3 year-old) <sup>(58-62)</sup> reported an improvement of growth in children treated with FMT as well.<sup>(62)</sup> However, given the high carriage rate of *C. difficile* in this group of age,<sup>(66-69)</sup> the right selection of patients eligible to this therapy is important.

As far as the safety is concerned, only mild transient symptoms (i.e. vomiting, abdominal pain and diarrhea) have been reported in pediatric series.<sup>(62-65)</sup>

### **FMT for IBD in pediatrics**

**Statement:** There is insufficient evidence to suggest FMT for the management of pediatric IBD. To date, its use should be limited to research setting.

**Quality of evidence:** low

**Strength of recommendation:** weak

**Comment:** To date, no RCTs evaluating the role of FMT in children with IBD are available. A few case series reported conflicting results in terms of efficacy.<sup>(9, 10, 12, 13, 22, 23, 69)</sup> The largest pediatric series published so far reported a clinical response (defined as a decrease of Pediatric UC Activity Score >15) at 1 month in 6 of 9 children with UC treated with serial faecal enemas.<sup>(9)</sup> Smaller studies reported no clinical improvement after FMT delivered via nasogastric tube.<sup>(12)</sup> Recently, a transitory withdrawal of immunosuppressants has been reported in 3 children with UC treated with high frequency faecal infusions firstly delivered by colonoscopy and then by serial enemas.<sup>(12)</sup>

Mild-to-moderate side effects were relatively common,<sup>(9, 13)</sup> and a case of transitory systemic reaction (profuse sweating, vomiting, paleness, tachycardia and fever) was described.<sup>(69)</sup>

## **DONOR SELECTION**

*Key issue: collection of medical history*

### **Recommendations for specific situations**

**Statement:** Additional inclusion/exclusion criteria could be considered when FMT is performed for indications other than CDI in the context of research setting.

**Quality of evidence:** low

**Strength of recommendation:** weak

**Comment:** This statement basically leaves to investigators the chance to design a specific donor profile within a specific research protocol approved by the appropriate regulatory authorities. Specific characteristics of the donor may influence FMT outcomes, especially when FMT is performed to treat chronic, multifactorial disorders, such as IBD or MS. The application of a ‘one-size-fits-all’ approach should be discouraged, as each disorder potentially curable with FMT has its unique imbalance of microbiota composition. For example, temporal bacterial community dynamics may vary among UC patients after FMT,(19, 6) whereas obese/overweight donors were excluded with satisfactory results in MS.(47) Such evidence comes from small sample studies and it is not possible, yet, to identify specific inclusion or exclusion criteria for each particular indication of FMT. Additional studies are required to thoroughly address this issue.

*Key issue: Testing for donor selection*

**Statement:** Potential donors could undergo additional testing when FMT is performed for indications other than CDI in the context of research setting.

**Quality of evidence:** low

**Strength of recommendation:** weak

**Comment:** In case of some particular indications, beyond general testing, additional exams can be exploited to select donors. For instance, full lipid and glycemic profiles of donor should be investigated when FMT is performed for metabolic disorders.

Nevertheless, there is no evidence suggesting this approach for improving specific outcomes, nor definite exclusion criteria for each particular indication of FMT have been well identified.

Additional studies are required to address this issue.

## **PREPARATION OF FAECAL MATERIAL**

*Key issue: Microbiota analysis of donors and recipients*

**Statement:** Metagenomic and phylogenetic analysis of microbiota are suggested only for research purposes.

**Quality of evidence:** low

**Strength of recommendation:** weak

**Comment:** Considering the overall high success rates of FMT for the treatment of rCDI and that specific donor does not seem to affect the efficacy outcome,(70-72) analyses of microbiota do not seem to have a role for the treatment of rCDI in clinical setting. Having in mind a markedly lower microbiota diversity in infants compared to adults,(73, 74) assessment of microbiota in pediatrics and their long term follow up could be reasonable. Phylogenetic analyses based on the sequence of 16S/18S rRNA gene have been proven as a powerful tool for defining dysbiosis in various diseases but also in assessing the change of microbiota during the course of FMT in IBD and rCDI.(18, 75-77) Vermeire et al suggested a link between donor microbial diversity and FMT outcomes in IBD patients.(21) In research settings, beyond CDI treatment, the assessment of microbiota has a potential to improve our understanding of disease resolution process, to introduce criteria for donor selection and technical procedures in indications with lower success of FMT.



## REFERENCES

- 1) Cammarota G, Ianiro G, Cianci R, et al. The involvement of gut microbiota in inflammatory bowel disease pathogenesis: Potential for therapy. *Pharmacol Ther* 2015;149:191-212.
- 2) Ianiro G, Bibbò G, Scaldaferrì F, et al. Fecal microbiota transplantation in inflammatory bowel disease: Beyond the excitement. *Medicine* 2014;93:e97.
- 3) Shi Y, Dong Y, Huang W, et al. Fecal Microbiota Transplantation for Ulcerative Colitis: A Systematic Review and Meta-Analysis. *PLoS One* 2016;11:e0157259.
- 4) Scaldaferrì F, Pecere S, Bruno G, et al. An Open-Label, Pilot Study to Assess Feasibility and Safety of Fecal Microbiota Transplantation in Patients With Mild-Moderate Ulcerative Colitis: Preliminary Results [abstract]. *Gastroenterology* 2015;148:S870.
- 5) Kump PK, Gröchenig HP, Spindelbock W, et al. Preliminary clinical results of repeatedly fecal microbiota transplantation (FMT) in chronic active ulcerative colitis [abstract]. *United European Gastroenterol J* 2013;1S:A57.
- 6) Angelberger S, Reinisch W, Makristathis A, et al. Temporal bacterial community dynamics vary among ulcerative colitis patients after fecal microbiota transplantation. *Am J Gastroenterol* 2013;108:1620-30.
- 7) Kump PK, Gröchenig HP, Lackner S, et al. Alteration of intestinal dysbiosis by fecal microbiota transplantation does not induce remission in patients with chronic active ulcerative colitis. *Inflamm Bowel Dis* 2013;19:2155-65.
- 8) Borody T, Wettstein A, Campbell J, et al. Fecal microbiota transplantation in ulcerative colitis: Review of 24 years experience [abstract]. *Am J Gastroenterol* 2012;107:S665.
- 9) Kunde S, Pham A, Bonczyk S, et al. Safety, tolerability, and clinical response after fecal transplantation in children and young adults with ulcerative colitis. *J Pediatr Gastroenterol Nutr* 2013;56:597-601.
- 10) Karolewska-Bochenek KLPI, Grzesiowski P, Banaszkiwicz AAP, et al. Fecal microbiota transplantation in refractory pediatric UC-preliminary data [abstract]. *J Crohns Colitis* 2015;Suppl 1:S294.
- 11) Damman CJ, Brittnacher MJ, Westerhoff M, et al. Low level engraftment and improvement following a single colonoscopic administration of fecal microbiota to patients with ulcerative colitis. *PLoS One* 2015;10:e0133925.
- 12) Kellermayer R, Nagy-Szakai D, Harris RA, et al. Serial fecal microbiota transplantation alters mucosal gene expression in pediatric ulcerative colitis. *Am J Gastroenterol* 2015;110:604-6.
- 13) Suskind DL, Singh N, Nielson H, et al. Fecal microbial transplant via nasogastric tube for active pediatric ulcerative colitis. *J Pediatr Gastroenterol Nutr* 2015;60:27-29.
- 14) Wei Y, Zhu W, Gong J, et al. Fecal microbiota transplantation improves the quality of life in patients with inflammatory bowel disease. *Gastroenterol Res Pract* 2015;2015:517597.
- 15) Ren R, Sun G, Yang Y, et al. A pilot study of treating ulcerative colitis with fecal microbiota transplantation. *Zhonghua Nei Ke Za Zhi* 2015;54:411-5.
- 16) Cui B, Li P, Xu L, et al. Step-up fecal microbiota transplantation strategy: a pilot study for steroid-dependent ulcerative colitis. *J Transl Med* 2015;13:298.
- 17) Paramsothy S, Kamm M, Walsh A, et al. Multi-donor intense faecal microbiota transplantation is an effective treatment for resistant ulcerative colitis: a randomised placebo-controlled trial [abstract]. *J Crohns Colitis* 2016;10:S14.
- 18) Rossen NG, Fuentes S, van der Spek MJ, et al. Findings from a randomized controlled trial of fecal transplantation for patients with ulcerative colitis. *Gastroenterology* 2015;149:110-8.

- 19) Moayyedi P, Surette MG, Kim PT, et al. Fecal microbiota transplantation induces remission in patients with active ulcerative colitis in a randomized controlled trial. *Gastroenterology* 2015;149:102-9.
- 20) Colombel JF, Sandborn WJ, Ghosh S, et al. Four-year maintenance treatment with adalimumab in patients with moderately to severely active ulcerative colitis: Data from ULTRA 1, 2, and 3. *Am J Gastroenterol* 2014;109:1771-80.
- 21) Vermeire S, Joossens M, Verbeke K, et al. Donor species richness determines faecal microbiota transplantation success in inflammatory bowel disease. *J Crohns Colitis* 2016;10:387-94.
- 22) Goyal A, Kufen A, Jackson Z, et al. A study of fecal microbiota transplantation in pediatric patients with inflammatory bowel disease [abstract]. *Inflamm Bowel Dis* 2016;22:S74.
- 23) Suskind DL, Brittnacher MJ, Wahbeh G, et al. Fecal microbial transplant effect on clinical outcomes and fecal microbiome in active Crohn's disease. *Inflamm Bowel Dis* 2015;21:556-63.
- 24) Cui B, Feng Q, Wang H, et al. Fecal microbiota transplantation through mid-gut for refractory Crohn's disease: safety, feasibility, and efficacy trial results. *J Gastroenterol Hepatol* 2015;30:51-8.
- 25) Yao Wei, Weiming Zhu, Jianfeng Gong, et al. Fecal microbiota transplantation improves the quality of life in patients with inflammatory bowel disease. *Gastroenterol Res Pract* 2015;2015:517597.
- 26) Kahn SA, Goepfing SR, Vaughn BP, et al. Tolerability of colonoscopic fecal microbiota transplantation in IBD [abstract]. *Gastroenterology* 2014;146 (Suppl.1):S-581.
- 27) Vermeire S, Joossens M, Verbeke K, et al. Pilot study on the safety and efficacy of faecal microbiota transplantation in refractory Crohn's disease [abstract]. *Gastroenterology* 2012;142:S360.
- 28) Vaughn BP, Gevers D, Ting A, et al. Fecal microbiota transplantation induces early improvement in symptoms in patients with active Crohn's disease [abstract]. *Gastroenterology* 2014;146 (Suppl.1):S591-2.
- 29) Stallmach A, Lange K, Buening J, et al. Fecal microbiota transfer in patients with chronic antibiotic-refractory pouchitis. *Am J Gastroenterol* 2016;111:441-3.
- 30) Landy J, Walker AW, Li JV, et al. Variable alterations of the microbiota, without metabolic or immunological change, following faecal microbiota transplantation in patients with chronic pouchitis. *Sci Rep* 2015;5:12955.
- 31) Ohman L, Tombiom H, Simren M. Crosstalk at the mucosal border: importance of the gut microenvironment in IBS. *Nat Rev Gastroenterol Hepatol* 2015;12:36-49.
- 32) Simrén M, Barbara G, Flint HJ, et al. Intestinal microbiota in functional bowel disorders: a Rome foundation report. *Gut* 2013;62:159-76.
- 33) Thabane M, Kottachchi DT, Marshall JK. Systematic review and meta-analysis: the incidence and prognosis of post-infectious irritable bowel syndrome. *Aliment Pharmacol Ther* 2007;26:535-44.
- 34) Halvorson HA, Schlett CD, Riddle MS. Postinfectious irritable bowel syndrome—a metaanalysis. *Am J Gastroenterol* 2006;101:1894-9.
- 35) Cremon C, Stanghellini V, Pallotti F, et al. Salmonella gastroenteritis during childhood is a risk factor for irritable bowel syndrome in adulthood. *Gastroenterology* 2014;147:69-77.
- 36) Jalanka-Tuovinen J, Saloiarvi J, Salonen A, et al. Faecal microbiota composition and host-microbe cross-talk following gastroenteritis and in postinfectious irritable bowel syndrome. *Gut* 2014;6:1737-45.
- 37) Si JM, Yu YC, Fan YJ, et al. Intestinal microecology and quality of life in irritable bowel syndrome patients. *World J Gastroenterol* 2004;10:1802-5.
- 38) Matto J, Maunuksela L, Kajander K, et al. Composition and temporal stability of gastrointestinal microbiota in irritable bowel syndrome—a longitudinal study in IBS and control subjects. *FEMS Immunol Med Microbiol* 2005;43:213-22.

- 39) Malinen E, Rinttila T, Kajander K, et al. Analysis of the fecal microbiota of irritable bowel syndrome patients and healthy controls with real-time PCR. *Am J Gastroenterol* 2005;100:373-82.
- 40) Modi RS, Collins JJ, Relman DA. Antibiotics and the gut microbiota *J Clin Invest* 2014;124:4212-8.
- 41) Borody TJ, George L, Andrews P, et al. Bowel-flora alteration: a potential cure for inflammatory bowel disease and irritable bowel syndrome? *Med J Aust* 1989;150:604.
- 42) Andrews PJ, Barnes P, Borody TJ. Chronic constipation reversed by restoration of the bowel flora. A case and a hypothesis. *European J Gastroenterol Hepatol* 1992;4:245-7).
- 43) Andrews PJ, Borody TJ. "Putting back the bugs": bacterial treatment relieves chronic constipation and symptoms of irritable bowel syndrome. *Med J Aust* 1993;159:633-4.
- 44) Pinn DM, Aroniadis OC, Brandt LJ. Is fecal microbiota transplantation the answer for irritable bowel syndrome? A single-center experience. *Am J Gastroenterol* 2014;109:1831-2.
- 45) Holvoet T, Joossens M, Wang J, et al. Assessment of faecal microbial transfer in irritable bowel syndrome with severe bloating. *Gut* Published Online First: 10 August 2016. doi: 10.1136/gutjnl-2016-312513
- 46) Tian H, Ding C, Gong J, et al. Treatment of slow transit constipation with fecal microbiota transplantation: a pilot study. *J Clin Gastroenterol* Published Online First: 8 January 2016. doi: 10.1097/MCG.0000000000000472
- 47) Vrieze A, Van Nood E, Holleman F, et al. Transfer of intestinal microbiota from lean donors increases insulin sensitivity in individuals with metabolic syndrome. *Gastroenterology* 2012;143:913-6.
- 48) Ley RE, Turnbaugh PJ, Klein S, et al. Microbial ecology: human gut microbes associated with obesity. *Nature* 2006;444:1022-3.
- 49) Le Chatelier E, Nielsen T, Qin J, et al. Richness of human gut microbiome correlates with metabolic markers. *Nature* 2013;500:541-6.
- 50) Karlsson FH, Tremaroli V, Nookaew I, et al. Gut metagenome in European women with normal, impaired and diabetic glucose control. *Nature* 2013;498:99-103.
- 51) Liou AP, Paziuk M, Luevano JM, et al. Conserved shifts in the gut microbiota due to gastric bypass reduce host weight and adiposity. *Sci Transl Med* 2013;5:178ra41.
- 52) Arora T, Bäckhed F. The gut microbiota and metabolic disease: current understanding and future perspectives. *J Intern Med* Published Online First: 12 April 2016. doi: 10.1111/joim.12508.
- 53) Dao MC, Everard A, Aron-Wisnewsky J, et al. Akkermansia muciniphila and improved metabolic health during a dietary intervention in obesity: relationship with gut microbiome richness and ecology. *Gut* 2016;65:426-36.
- 54) Li J, Lin S, Vanhoutte PM, et al. Akkermansia Muciniphila Protects Against Atherosclerosis by Preventing Metabolic Endotoxemia-Induced Inflammation in Apoe<sup>-/-</sup> Mice. *Circulation* 2016;133:2434-46.
- 55) Khan MT, Nieuwdorp M, Bäckhed F. Microbial modulation of insulin sensitivity. *Cell Metab* 2014;20:753-60.
- 56) Henao-Mejia J, Elinav E, Jin C, et al. Inflammasome-mediated dysbiosis regulates progression of NAFLD and obesity. *Nature* 2012;482:179-85.
- 57) Li SS, Zhu A, Benes V, et al Durable coexistence of donor and recipient strains after fecal microbiota transplantation. *Science* 2016;352:586-9.
- 58) Kronman MP, Nielson HJ, Adler AL, et al. Fecal microbiota transplantation via nasogastric tube for recurrent Clostridium difficile infection in pediatric patients. *J Pediatr Gastroenterol Nutr* 2015;60:23-6.
- 59) Russell GH, Kaplan JL, Youngster I, et al. Fecal transplant for recurrent Clostridium difficile infection in children with and without inflammatory bowel disease. *J Pediatr Gastroenterol Nutr* 2014;58:588-92.

- 60) Pierog A, Mencin A, Reilly NR. Fecal microbiota transplantation in children with recurrent *Clostridium difficile* infection. *Pediatr Infect Dis J* 2014; 33:1198-200.
- 61) Walia R, Garg S, Song Y, et al. Efficacy of fecal microbiota transplantation in 2 children with recurrent *Clostridium difficile* infection and its impact on their growth and gut microbiome. *J Pediatr Gastroenterol Nutr* 2014;59:565-70.
- 62) Kahn SA, young S, Rubin DT. Colonoscopic fecal microbiota transplant for recurrent *Clostridium difficile* infection in a child. *Am J Gastroenterol* 2012;107:1930-1.
- 63) Kelly CR, Ihunnah C, Fischer M, et al. Fecal microbiota transplant for treatment of *Clostridium difficile* infection in immunocompromised patients. *Am J Gastroenterol* 2014;109:1065-71.
- 64) Wang J, Xiao Y, Lin K, et al. Pediatric severe pseudomembranous enteritis treated with fecal microbiota transplantation in a 13-month-old infant. *Biomed Rep* 2015;3:173-5.
- 65) Hourigan SK, Chen LA, Grigoryan Z, et al. Microbiome changes associated with sustained eradication of *Clostridium difficile* after single faecal microbiota transplantation in children with and without inflammatory bowel disease. *Aliment Pharmacol Ther* 2015;42:741-52.
- 66) Hourigan SK and Oliva-Hemker M. Fecal microbiota transplantation in children: a brief review. *Pediatr Res* 2016;16:1-5.
- 67) Schutze GE, Willoughby RE Committee on Infectious Diseases; American Academy of Pediatrics. *Clostridium difficile* infection in infants and children. *Pediatrics* 2013;131:196-200.
- 68) Shim JO. *Clostridium difficile* in children: to treat or not to treat? *Pediatr Gastroenterol Hepatol Nutr* 2014;17:80-4.
- 69) Vandenplas Y, Veereman G, van der Werff Ten Bosch J, et al. Fecal microbial transplantation in early-onset colitis: caution advised. *J Pediatr Gastroenterol Nutr* 2015;61:12-4.
- 70) Drekonja D, Reich J, Gezahegn S, et al. Fecal microbiota transplantation for *Clostridium difficile* infection: A systematic review. *Ann Intern Med* 2015;162:630-8.
- 71) Satokari R, Mattila E, Kainulainen V, et al. Simple faecal preparation and efficacy of frozen inoculum in faecal microbiota transplantation for recurrent *Clostridium difficile* infection--an observational cohort study. *Aliment Pharmacol Ther* 2015;41:46-53.
- 72) Ray A, Jones C. Does the donor matter? Donor vs patient effects in the outcome of a next-generation microbiota-based drug trial for recurrent *Clostridium difficile* infection. *Future Microbiol* 2016;11:611-6.
- 73) Cheng J, Ringel-Kulka T, Heikamp-de Jong I, et al. Discordant temporal development of bacterial phyla and the emergence of core in the fecal microbiota of young children. *ISME J* 2016;10:1002-14.
- 74) Yatsunenko T, Rey FE, Manary MJ, et al. Human gut microbiome viewed across age and geography. *Nature* 2012;486:222-7.
- 75) Zoetendal EG, Rajilić-Stojanović M, de Vos WM. High-throughput diversity and functionality analysis of the gastrointestinal tract microbiota. *Gut* 2008;57:1605-15.
- 76) Frank DN, St Amand AL, Feldman RA, et al. Molecular-phylogenetic characterization of microbial community imbalances in human inflammatory bowel diseases. *Proc Natl Acad Sci U S A* 2007;104:13780-5.
- 77) Fuentes S, van Nood E, Heikamp-de Jong I, et al. Reset of a critically disturbed microbial ecosystem: faecal transplant in recurrent *Clostridium difficile* infection. *ISME J* 2014;8:1621-33.
