# Supplementary material for: European consensus conference on faecal microbiota transplantation in clinical practice
Source: PubMed Central journal article supplement — Gut. 2017 Jan 13;66(4):569–80. doi: 10.1136/gutjnl-2016-313017 (PMC5529972; doi:10.1136/gutjnl-2016-313017), 2017-01-13
Supplement: gutjnl-2016-313017supp002.pdf [file gutjnl-2016-313017supp002.pdf]

## Supplementary 2

**Table.** Summary of Consensus statements on indications of FMT in clinical practice.

| <i>Indication</i>                                      | <i>Statement</i>                                                                                                                                                  | <i>QoE</i>             | <i>SoR</i>               |
|--------------------------------------------------------|-------------------------------------------------------------------------------------------------------------------------------------------------------------------|------------------------|--------------------------|
| CDI:<br>· Recurrent<br>· Refractory<br>· First episode | FMT is recommended both in mild and severe disease .<br>FMT can be considered as effective option.<br>Insufficient evidence to suggest FMT; only research.        | High<br>Low<br>Low     | Strong<br>Strong<br>Weak |
| IBD:<br>· UC<br>· CD<br>· Pouchitis                    | Insufficient evidence to suggest FMT; only research<br>Insufficient evidence to suggest FMT; only research<br>Insufficient evidence to suggest FMT; only research | Moderate<br>Low<br>Low | Weak<br>Weak<br>Weak     |
| IBS                                                    | Insufficient evidence to suggest FMT; only research                                                                                                               | Low                    | Weak                     |
| Metabolic disorders                                    | Insufficient evidence to suggest FMT; only research                                                                                                               | Low                    | Weak                     |
| Pediatrics:<br>· Recurrent CDI<br>· IBD                | FMT may have a role in clinical practice.<br>Insufficient evidence to suggest FMT; only research.                                                                 | Low<br>Low             | Weak<br>Weak             |

**Table.** Summary of Consensus statements on donor selection.

| <i>Donor selection</i>                                                   | <i>Statement synthesis</i>                                                                                                                                                                                                                                                     | <i>QoE</i>                | <i>SoR</i>                       |
|--------------------------------------------------------------------------|--------------------------------------------------------------------------------------------------------------------------------------------------------------------------------------------------------------------------------------------------------------------------------|---------------------------|----------------------------------|
| Collection of medical history:<br>· General<br><br>· Specific situations | Preliminary clinical interview to exclude risk factors (see Table 4)<br><br>After laboratory testing and on day of donation, further clinical interview to check for potential harmful issues (see Table 5)<br><br>Additional exclusion criteria for other non-CDI indications | Low<br><br>Low<br><br>Low | Strong<br><br>Strong<br><br>Weak |
| Testing of donor:<br>· General<br><br>· Specific situations              | Suitable donors for FMT should undergo both blood and stool testing preferably by 6 weeks before donation (see Table 6)<br><br>Potential donors could undergo additional testing when FMT is performed in research for other indications other than CDI                        | Low<br><br>Low            | Strong<br><br>Weak               |
| Choice of donors                                                         | Related or unrelated donors can be chosen when FMT is performed to treat CDI                                                                                                                                                                                                   | Moderate                  | Strong                           |

**Table.** Summary of Consensus statements on preparation of faecal material.

| <i>Preparation of faecal material</i>          | <i>Statement synthesis</i>                                                                                                                                                                                                                                                                                       | <i>QoE</i> | <i>SoR</i> |
|------------------------------------------------|------------------------------------------------------------------------------------------------------------------------------------------------------------------------------------------------------------------------------------------------------------------------------------------------------------------|------------|------------|
| Stool handling and preparation of fresh faeces | A minimum set of general steps have to be followed (see Table 7)                                                                                                                                                                                                                                                 | Moderate   | Strong     |
| Frozen faeces preparation and defrosting       | Freeze-stored faeces can be used in FMT. Use at least 30 grams of faeces, 150 ml of saline solution and 20 ml of 85% glycerol. The final suspension should be clearly and traceably labelled and stored at -80°C. After thawing, saline solution can be added. Repetitive thawing and freezing should be avoided | Moderate   | Strong     |
| Microbiota assessment                          | The assessment of total microbiota by high throughput 16S rDNA sequencing or metagenomics is recommended for research purposes, but not for routine clinical treatment of CDI                                                                                                                                    | Low        | Weak       |

**Table.** Summary of Consensus statements on clinical management and faecal delivery.

| <i>Faecal delivery and follow-up</i>                                                | <i>Statement</i>                                                                                                                                                                                                                                         | <i>QoE</i>              | <i>SoR</i>                     |
|-------------------------------------------------------------------------------------|----------------------------------------------------------------------------------------------------------------------------------------------------------------------------------------------------------------------------------------------------------|-------------------------|--------------------------------|
| Recipient preparation:<br>· Antibiotics<br><br>· Bowel lavage                       | A 3-day antibiotic pre-treatment course is suggested for recurrent CDI before FMT. Stop antibiotics 12 to 48 hours before stool infusion<br><br>Bowel cleaning before FMT should be performed                                                            | Moderate<br><br>Low     | Strong<br><br>Strong           |
| Route of faecal delivery:<br>· Colonoscopy<br><br>· Enema(s)<br>· Upper GI tract    | Apply stool in right colon in CDI patients; if not possible or in severe colitis, apply stools in left colon.<br>Apply one or more enemas in usual manner.<br>Via endoscope, NGT, NJT, or gastrostomy. Keep patients in upright position after infusion. | High<br>Low<br><br>High | Strong<br>Strong<br><br>Strong |
| Safety considerations                                                               | FMT is safe. In critically ill patients consider infusion by enema                                                                                                                                                                                       | Low                     | Strong                         |
| Repeated faecal infusion                                                            | Faecal infusion can be repeated after treatment failure                                                                                                                                                                                                  | High                    | Strong                         |
| Monitoring of patients:<br>· Short-term AE<br>· Long-term AE<br>· Efficacy outcomes | Observe patients for complication after the procedure<br>Long-term period is not determined; monitor clinical data<br>CDI patients should be followed up for at least 8 week after FMT                                                                   | Low<br>Low<br>Low       | Weak<br>Weak<br>Strong         |

**Table.** Summary of Consensus statements on FMT centre.

| <i>FMT centre</i>                           | <i>Statement</i>                                                                                                                                                                                                           | <i>QoE</i>                           | <i>SoR</i>                                     |
|---------------------------------------------|----------------------------------------------------------------------------------------------------------------------------------------------------------------------------------------------------------------------------|--------------------------------------|------------------------------------------------|
| Clinical requirements and facilities        | Implementation of referral centres in proficient hospitals is encouraged<br>FMT staff should be trained<br>FMT staff should be multidisciplinary<br>Availability of general facilities<br>Clinical governance is mandatory | Moderate<br>Low<br>Low<br>Low<br>Low | Strong<br>Strong<br>Strong<br>Strong<br>Strong |
| Microbiological requirements and facilities | Safe processing of human samples is mandatory<br>Documentation stored for at least ten years                                                                                                                               | Low<br>Low                           | Strong<br>Strong                               |
| Regulatory requirements                     | Implementation of registers to collect data is recommended.<br>If any, specific national rules should be followed                                                                                                          | Low<br>Low                           | Strong<br>Strong                               |

AE: adverse events. CDI: *Clostridium difficile* infection. FMT faecal microbiota transplantation. GI: gastrointestinal. IBD: inflammatory bowel disease. NGT: nasogastric tube. NJT: nasojejunal tube. QoE: quality of evidence. SoR: Strength of recommendation.
